# Supplementary material
Source: publisher figshare collection journal article supplement (https://acs.figshare.com/ndownloader/files/4508884)
Supplement: Supplementary file 1 [file 4508884]

**Supporting Information:**  
**to**  
**Rapid, Selective and Reversible Nitroxide**  
**Radical Coupling (NRC) Reactions at**  
**Ambient Temperature.**

*Jakov Kulis, Craig A. Bell, Aaron S. Micallef, Zhongfan Jia and Michael J. Monteiro\**

1. Australian Institute for Bioengineering and Nanotechnology, University of  
Queensland, Brisbane QLD 4072, Australia

*Synthesis of tris(2-(dimethylamino)ethyl)amine (Me<sub>6</sub>TREN)*

Me<sub>6</sub>TREN was synthesized using the previously described method of Ciampolini *et al.* The <sup>1</sup>H and <sup>13</sup>C NMR spectra of the product were consistent with those reported in the literature. <sup>1</sup>H NMR (CDCl<sub>3</sub>): δ 2.19 (s, 18H, N(CH<sub>2</sub>CH<sub>2</sub>N(CH<sub>3</sub>)<sub>2</sub>)<sub>3</sub>), 2.35 (m, 6H, N(CH<sub>2</sub>CH<sub>2</sub>N(CH<sub>3</sub>)<sub>2</sub>)<sub>3</sub>), 2.57 (m, 6H, N(CH<sub>2</sub>CH<sub>2</sub>N(CH<sub>3</sub>)<sub>2</sub>)<sub>3</sub>); <sup>13</sup>C NMR (CDCl<sub>3</sub>): δ 45.84 (N(CH<sub>2</sub>CH<sub>2</sub>N(CH<sub>3</sub>)<sub>2</sub>)<sub>3</sub>), 53.01 (N(CH<sub>2</sub>CH<sub>2</sub>N(CH<sub>3</sub>)<sub>2</sub>)<sub>3</sub>), 57.42 (N(CH<sub>2</sub>CH<sub>2</sub>N(CH<sub>3</sub>)<sub>2</sub>)<sub>3</sub>). Ciampolini, M.; Nardi, N. *Inorg. Chem.* **1966**, *5*, 41-44.

*Synthesis of functional nitroxides*

(i) TEMPO-OH (4-hydroxy-2,2,6,6-tetramethylpiperidin-1-yloxyl)

To a solution of 2,2,6,6-tetramethyl-4-piperidinol (5.00 g, 3.18 x 10<sup>-2</sup> mol) in MeOH (59.2 mL) and MeCN (4.23 mL) was added NaHCO<sub>3</sub> (2.13 g, 2.54 x 10<sup>-2</sup> mol) and Na<sub>2</sub>WO<sub>4</sub>·2H<sub>2</sub>O (0.305 g, 9.23 x 10<sup>-4</sup> mol). H<sub>2</sub>O<sub>2</sub> 30% w/w (11.8 mL, 0.110 mol) was then added dropwise. After stirring in air at room temperature for 38 h the orange/red solution was diluted with brine (100 mL) and extracted with dichloromethane (3 x 60 mL). The combined organic phases were washed with brine (60 mL) and dried over Na<sub>2</sub>SO<sub>4</sub>. Removal of the solvent under reduced pressure gave a bright orange oil which was triturated with hexane to yield 4-hydroxy-2,2,6,6-tetramethylpiperidin-1-yloxyl, TEMPO-OH, as an orange solid (4.84 g, 88%). R<sub>f</sub> (50% EtOAc/hexane) 0.22; IR (ATR) ν<sub>(max)</sub> 3402 (br), 2974, 2948, 2928, 2858 (br) cm<sup>-1</sup>; GC-MS (EI<sup>+</sup>) m/z 172 (M<sup>+</sup>, 11 %), 158 (6 %), 142 (8 %), 85 (33 %), 71 (100 %), 57 (51 %), 41 (97 %). Only one peak was observed in the GC-MS chromatogram.

(ii) TEMPO-≡ (2,2,6,6-tetramethyl-4-(prop-2-ynyloxy)piperidine-1-yloxy)

TEMPO-≡ was synthesized according to the procedure of Reiser *et al.* To a stirred suspension of NaH (60% in mineral oil, 850 mg,  $2.13 \times 10^{-2}$  mol) in dry DMF (100 mL) at 0 °C, TEMPO-OH (3.0 g,  $1.74 \times 10^{-2}$  mol) was added portion wise. The reaction mixture was then stirred at room temperature for 30 min, with the visible evolution of hydrogen gas. Propargyl bromide (80 wt% in toluene, 2.0 mL,  $1.80 \times 10^{-2}$  mol) was added dropwise at 0 °C. The resulting mixture was stirred for 3 h at room temperature after which water (100 mL) was added and the solution extracted with EtOAc (2 x 50 mL). The organic phase was washed with water (2 x 50 mL), dried over anhydrous MgSO<sub>4</sub>, filtered, evaporated under reduced pressure and purified by column chromatography (silica gel, 10% EtOAc in hexane) to give the title compound as a dark orange solid (2.34 g, 64%). R<sub>f</sub> (50% EtOAc/hexane) 0.61; IR (ATR)  $\nu_{(\max)}$  3229 (sharp, strong), 2996, 2974, 2936 (br), 2111 (sharp, weak) cm<sup>-1</sup>; GC-MS (EI<sup>+</sup>) *m/z* 210 (M<sup>+</sup>, 13 %), 196 (15 %), 180 (19 %), 154 (20 %), 124 (27 %), 109 (35 %), 82 (76 %), 55 (59 %), 41 (100 %); microanalysis theory (C-68.54%, H-9.59%, N-6.66%), found (C-68.54%, H-9.72%, N-6.62%). Only one peak was observed in the GC-MS chromatogram. Unreacted TEMPO-OH was also recovered during column chromatography. Reiser, O.; Gheorghe, A.; Matsuno, A. *Adv. Synth. Catal.* **2006**, 348(9), 1016-1020.

(iii) TEMPO=O (4-oxo-TEMPO; 2,2,6,6-tetramethylpiperidon-1-yloxy)

To a solution of 2,2,6,6-tetramethyl-4-piperidinone (2.43 g,  $1.57 \times 10^{-2}$  mol) in MeOH (29.0 mL) and MeCN (2.1 mL) was added NaHCO<sub>3</sub> (1.05 g,  $1.25 \times 10^{-2}$  mol) and Na<sub>2</sub>WO<sub>4</sub>·2H<sub>2</sub>O (0.150 g,  $4.54 \times 10^{-4}$  mol). H<sub>2</sub>O<sub>2</sub> 30% w/w (5.80 mL, 0.055 mol) was then added dropwise. After stirring in air at room temperature for 48 h the

orange/red solution was diluted with water (50 mL) and extracted with diethyl ether (3 x 30 mL). The combined organic phases were washed with brine (30 mL) and dried over Na<sub>2</sub>SO<sub>4</sub>. Removal of the solvent under reduced pressure gave an orange oil which crystallized in the freezer to yield 4-oxo-TEMPO, TEMPO=O, as an orange solid (2.20 g, 83%). R<sub>f</sub> (50% EtOAc/hexane) 0.43; IR (ATR)  $\nu_{\text{(max)}}$  2999, 2981, 2937, 2898 (br), 1706 (sharp, strong) cm<sup>-1</sup>; GC-MS (EI<sup>+</sup>) *m/z* 170 (M<sup>+</sup>, 7 %), 114 (28 %), 83 (15 %), 56 (100 %), 41 (51 %). Only one peak was observed in the GC-MS chromatogram.

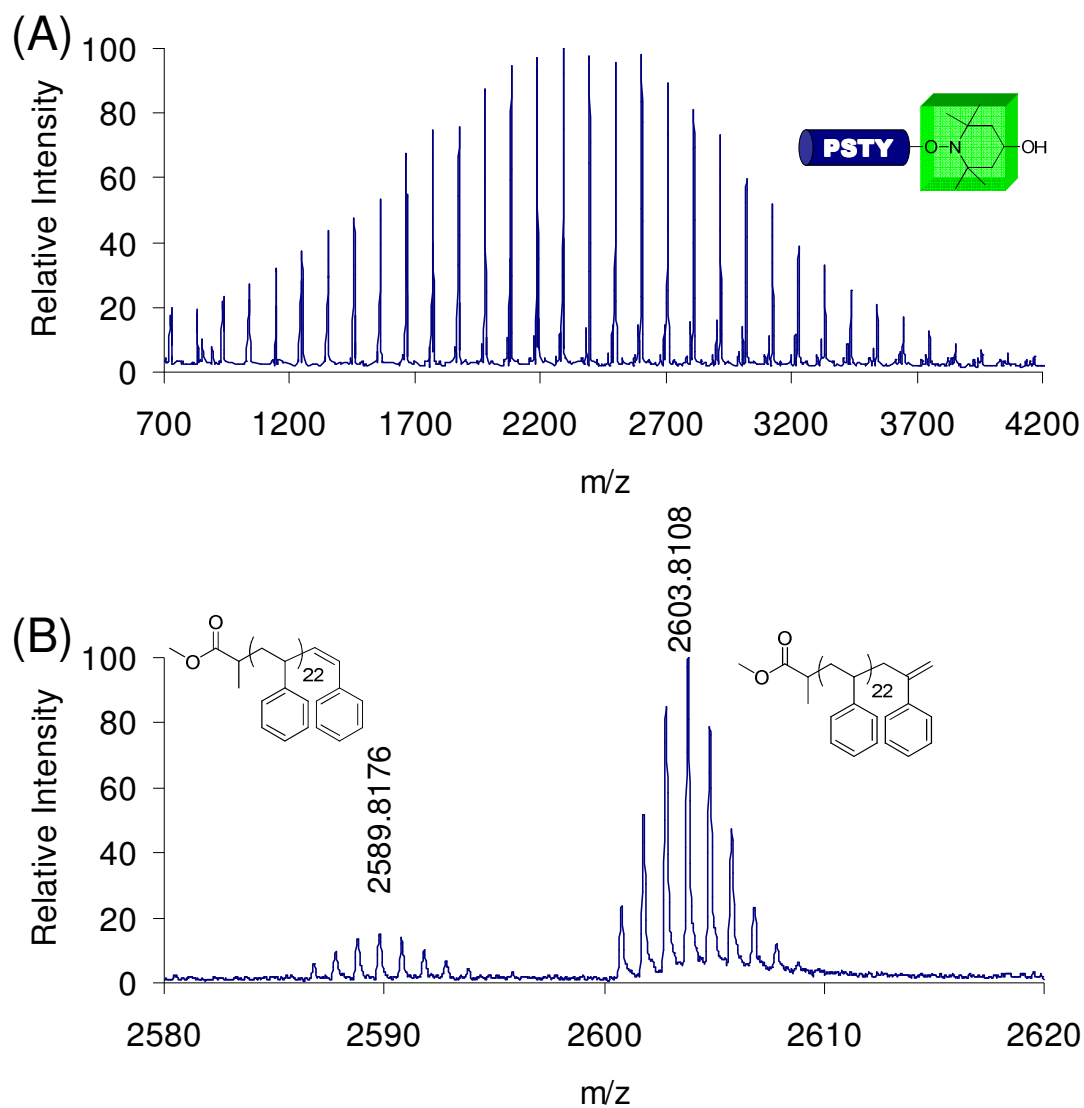

**Figure S1.** MALDI-ToF MS spectra of PSTY-TEMPO-OH formed from NRC of PSTY-Br and TEMPO-OH. (A) Full distribution and (B) expanded section of the spectrum showing peaks with isotopic resolution. The sample was acquired in reflectron mode using  $\text{Ag}(\text{CF}_3\text{COO})$  as the cationization source and DCTB as the matrix.

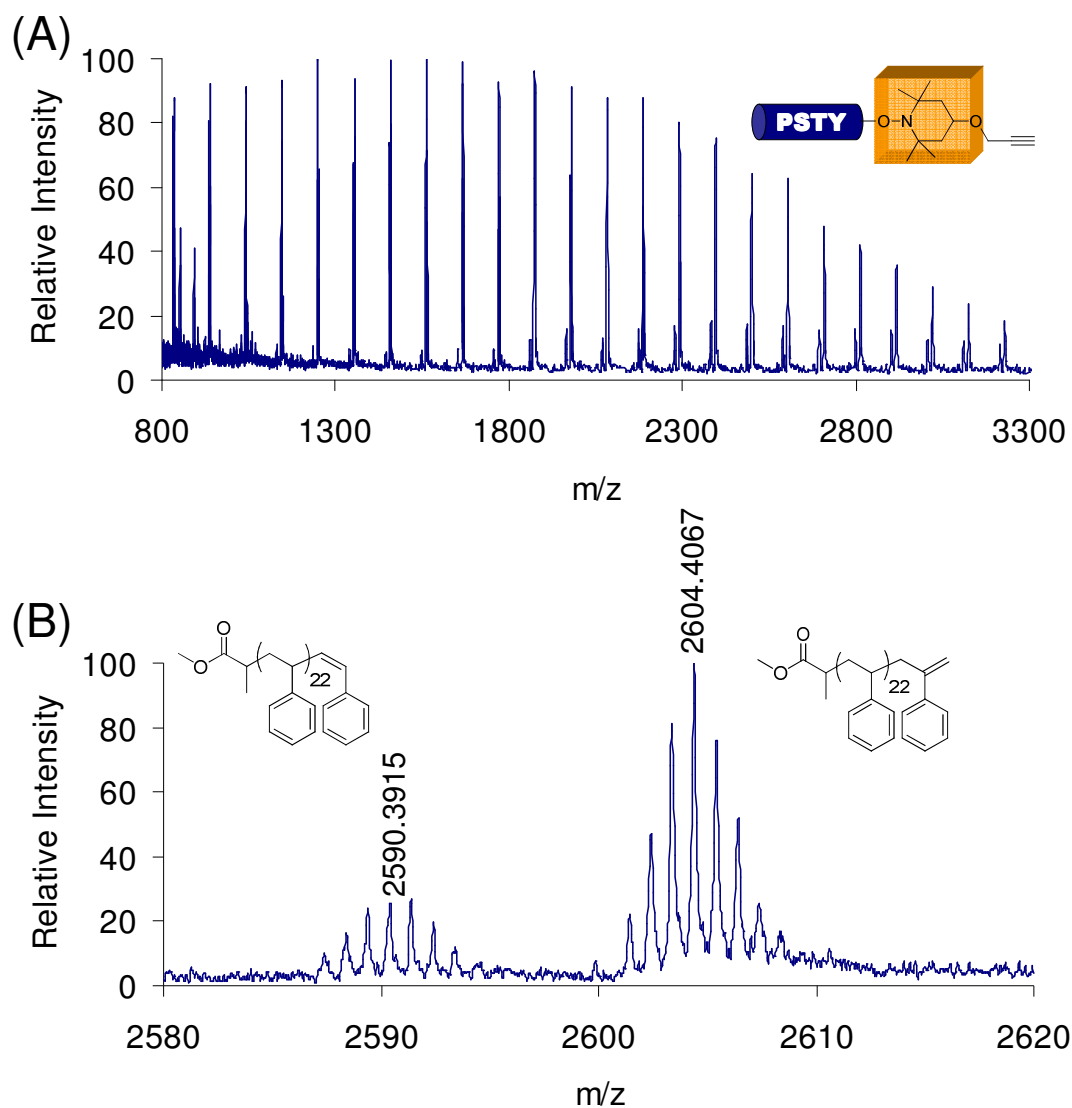

**Figure S2.** MALDI-ToF MS spectra of PSTY-TEMPO-≡ formed from PSTY-TEMPO-OH exchange with TEMPO-≡. (A) Full distribution and (B) expanded section of the spectrum showing peaks with isotopic resolution. The sample was acquired in reflectron mode using Ag(CF<sub>3</sub>COO) as the cationization source and DCTB as the matrix.

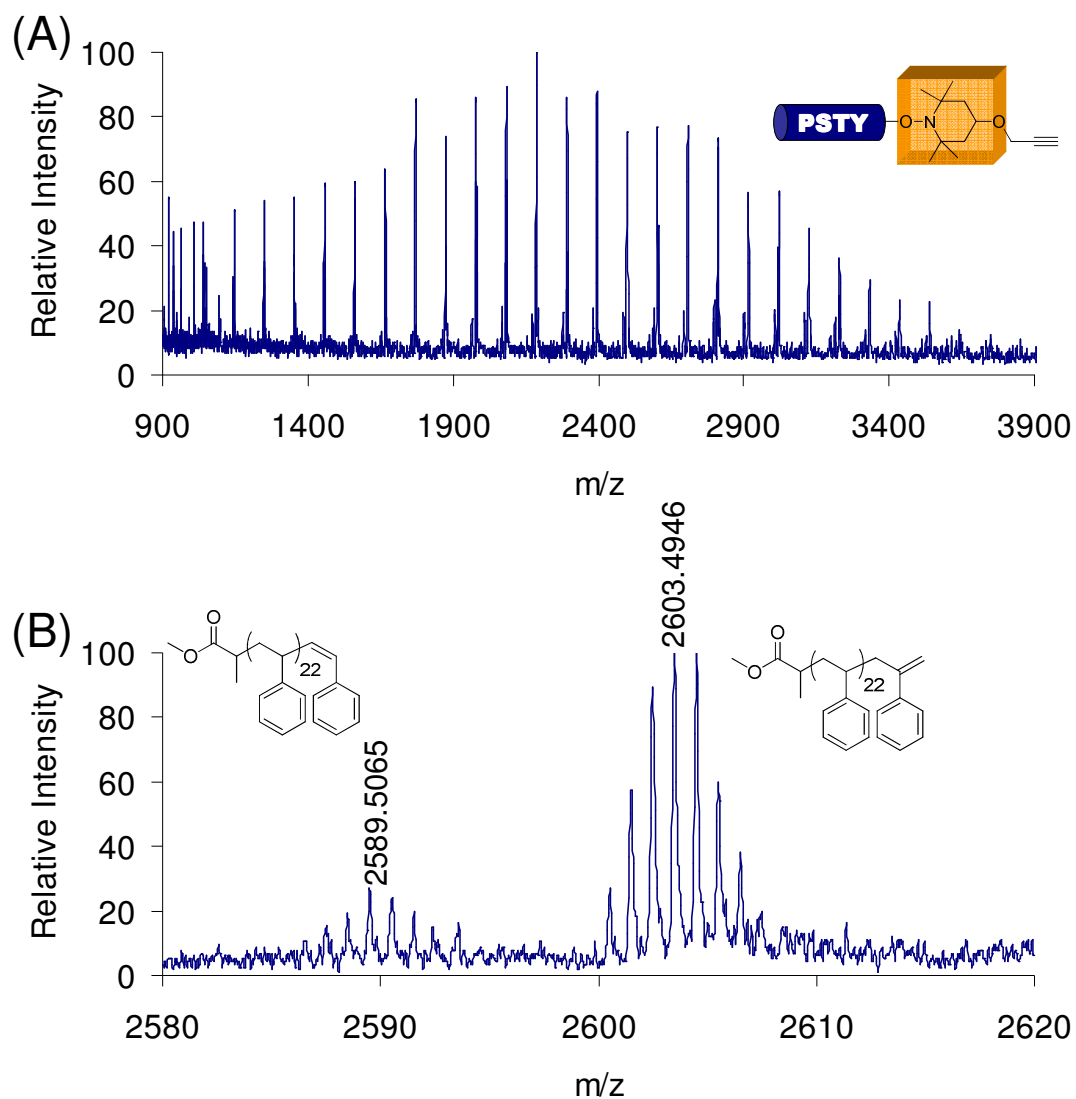

**Figure S3.** MALDI-ToF MS spectra of PSTY-TEMPO-≡ formed from NRC of PSTY-Br and TEMPO-≡. (A) Full distribution and (B) expanded section of the spectrum showing peaks with isotopic resolution. The sample was acquired in reflectron mode using  $\text{Ag}(\text{CF}_3\text{COO})$  as the cationization source and DCTB as the matrix.

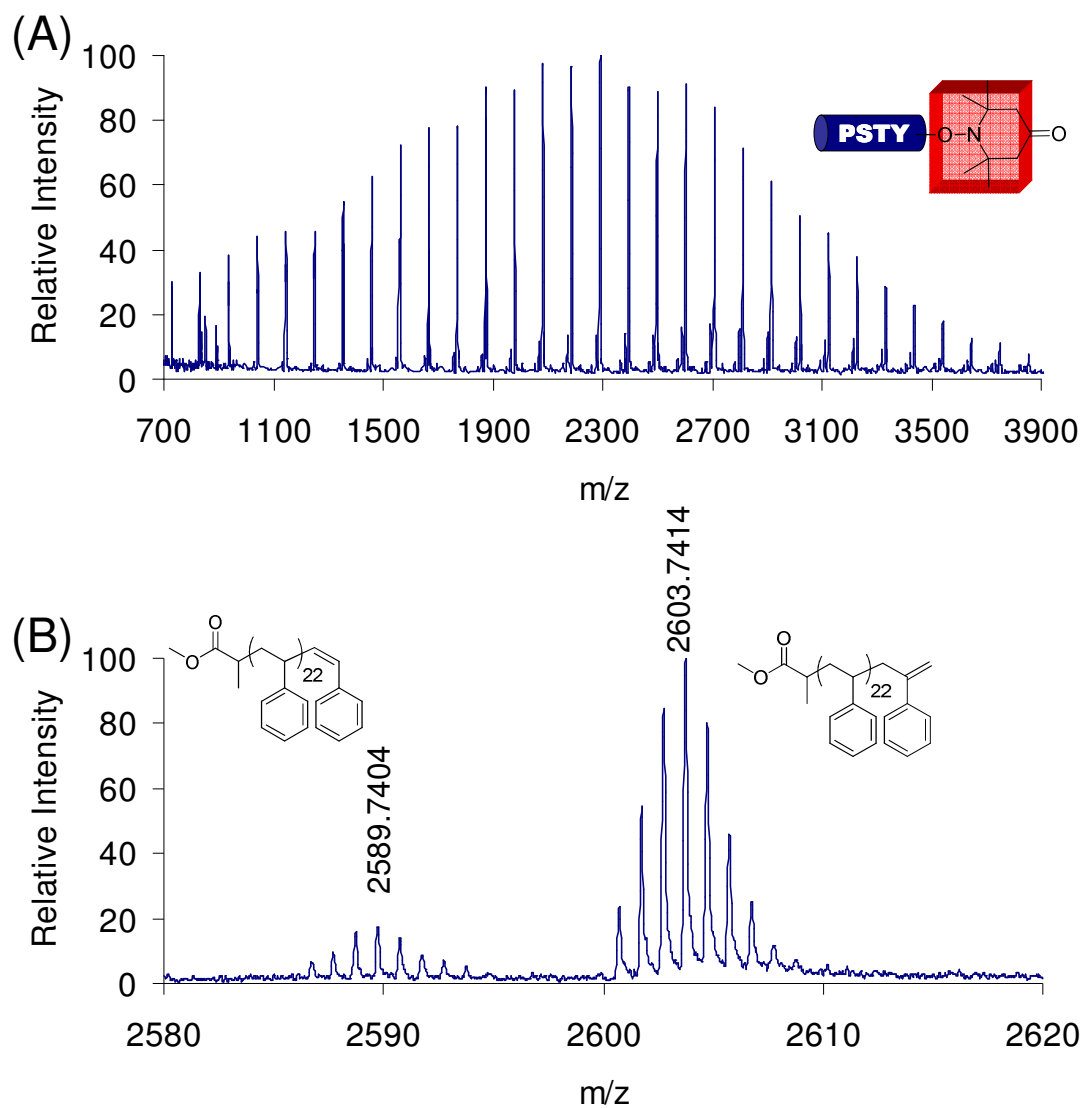

**Figure S4.** MALDI-ToF MS spectra of PSTY-TEMPO=O formed from NRC of PSTY-Br and TEMPO=O. (A) Full distribution and (B) expanded section of the spectrum showing peaks with isotopic resolution. The sample was acquired in reflectron mode using  $\text{Ag}(\text{CF}_3\text{COO})$  as the cationization source and DCTB as the matrix.



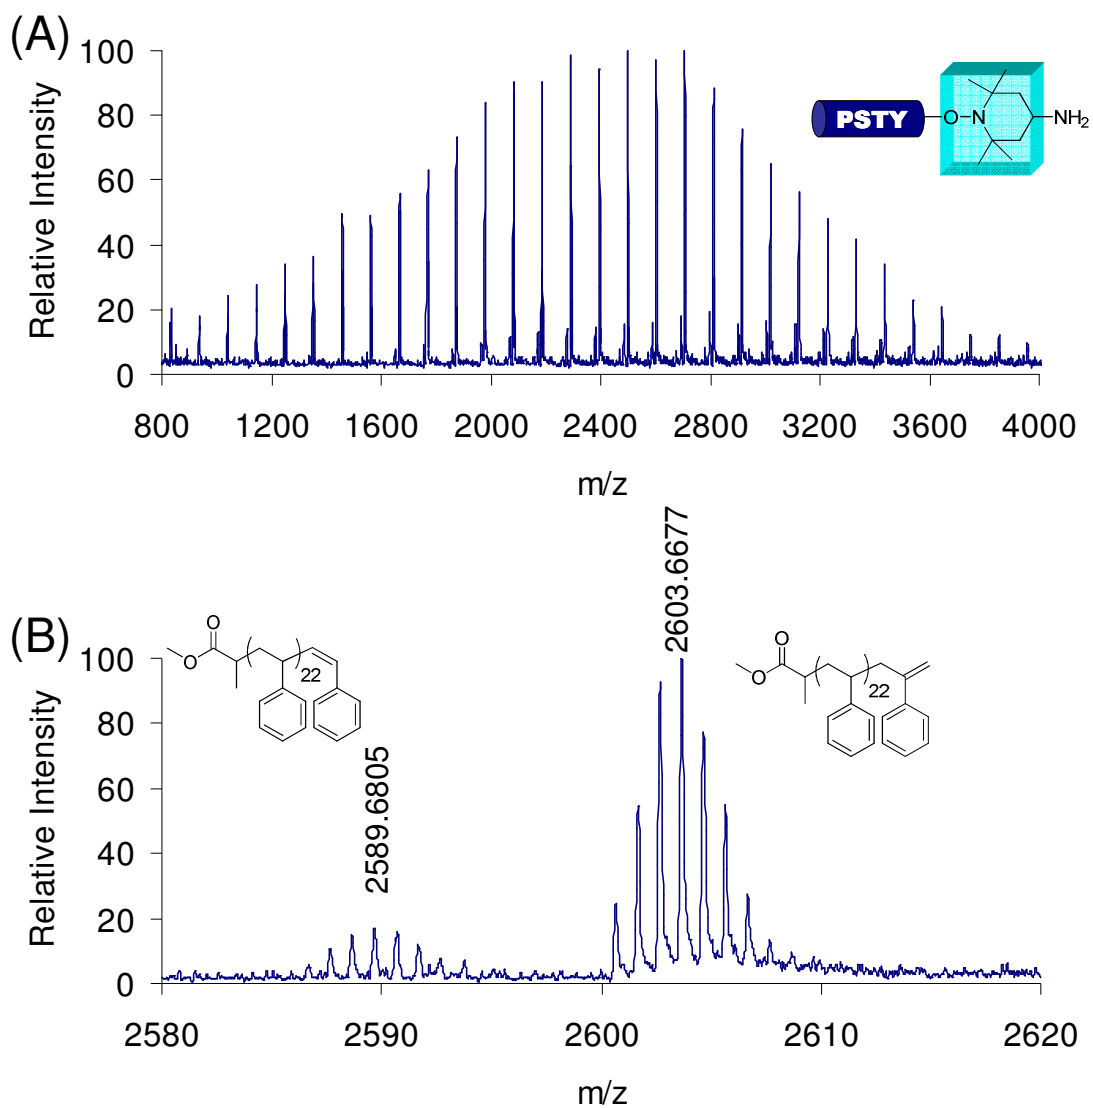

**Figure S5.** MALDI-ToF MS spectra of PSTY-TEMPO-NH<sub>2</sub> formed from NRC of PSTY-Br and Tempo-NH<sub>2</sub> (A) Full distribution and (B) expanded section of the spectrum showing peaks with isotopic resolution. The sample was acquired in reflectron mode using Ag(CF<sub>3</sub>COO) as the cationization source and DCTB as the matrix.

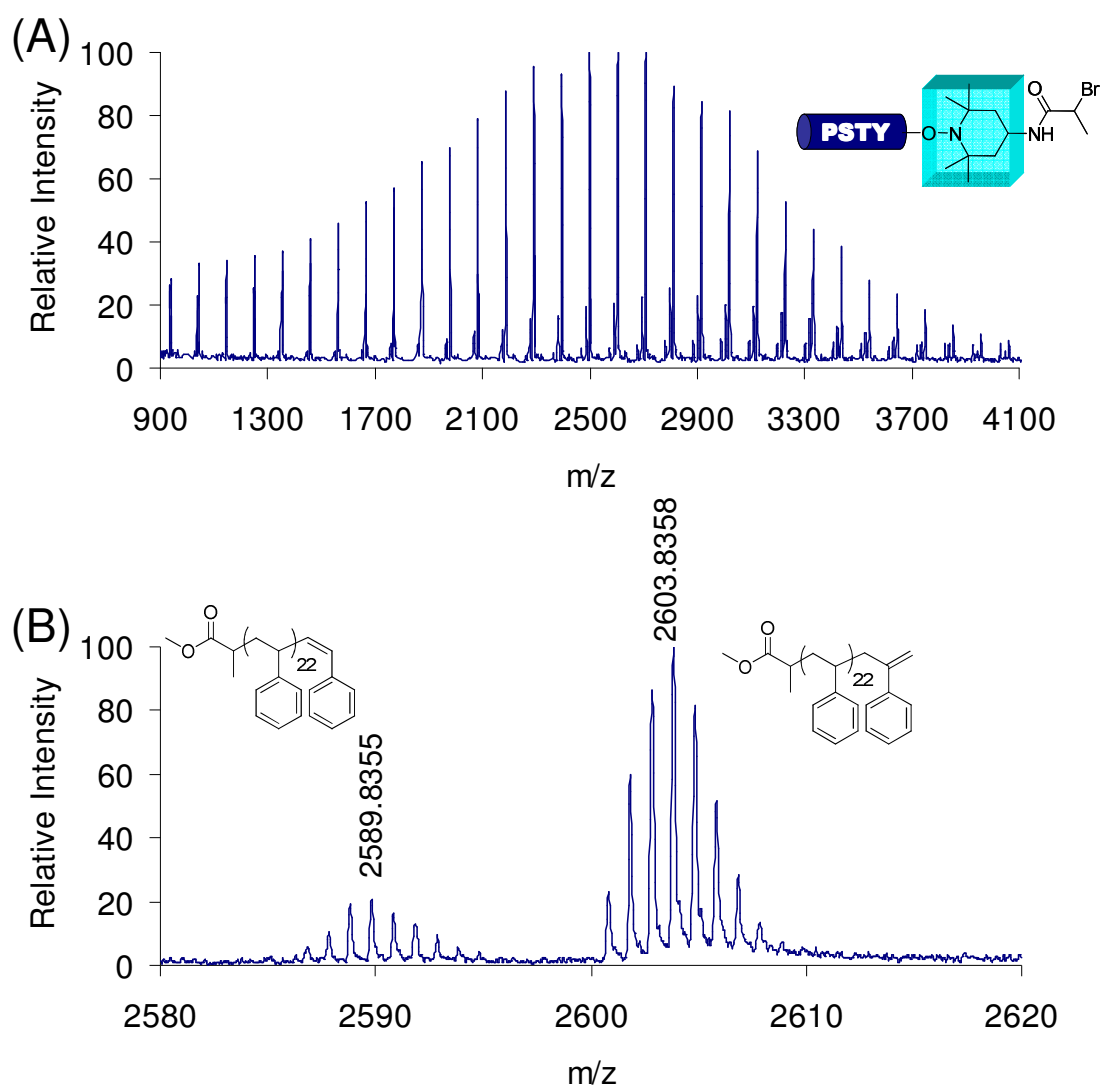

**Figure S6.** MALDI-ToF MS spectra of PSTY-TEMPO-2-bromopropanamide formed from acylation of PSTY-TEMPO-NH<sub>2</sub> with 2-bromopropionyl bromide (A) Full distribution and (B) expanded section of the spectrum showing peaks with isotopic resolution. The sample was acquired in reflectron mode using Ag(CF<sub>3</sub>COO) as the cationization source and DCTB as the matrix.

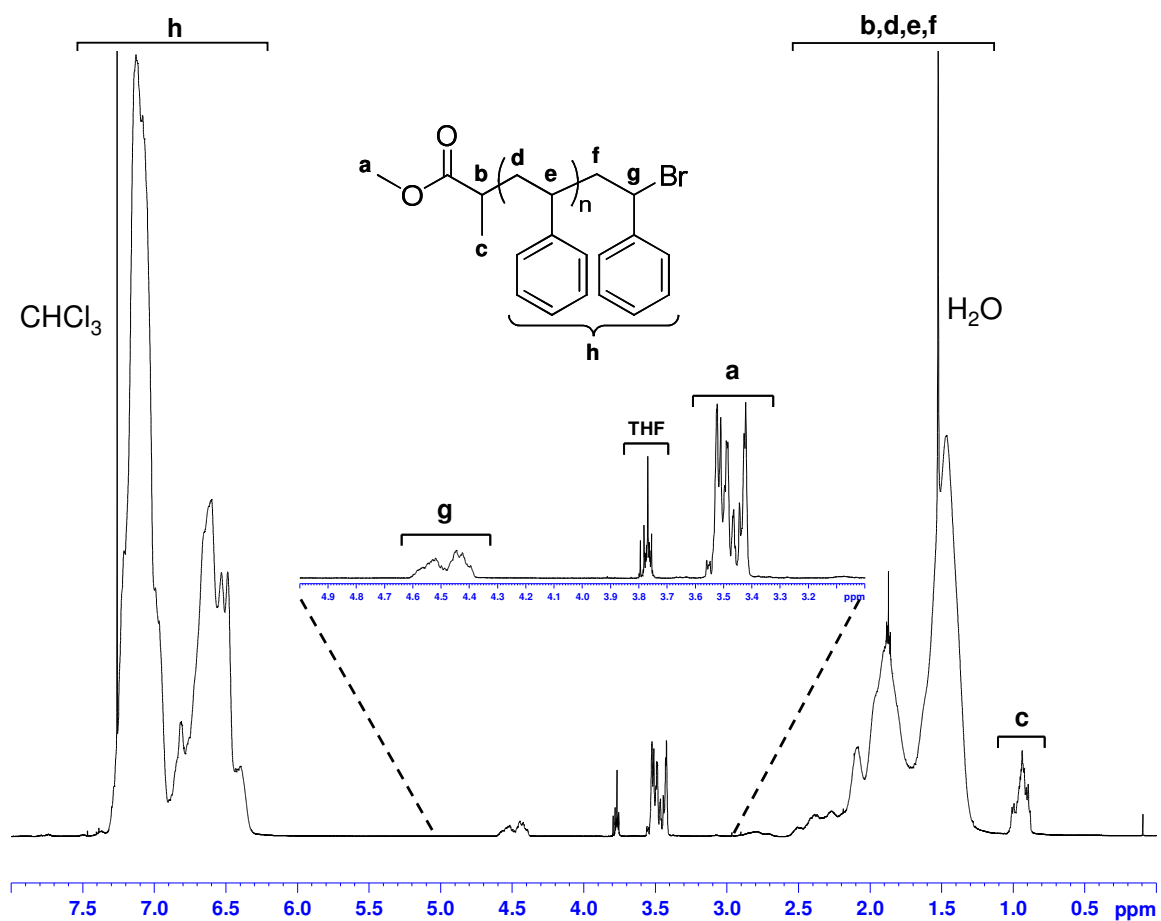

**Figure S7.**  $^1\text{H}$  NMR spectra of PSTY-Br with expanded view of region between 3 and 5 ppm. The sample was obtained on a Bruker DRX 400 MHz spectrometer and the solvent used was  $\text{CDCl}_3$ .

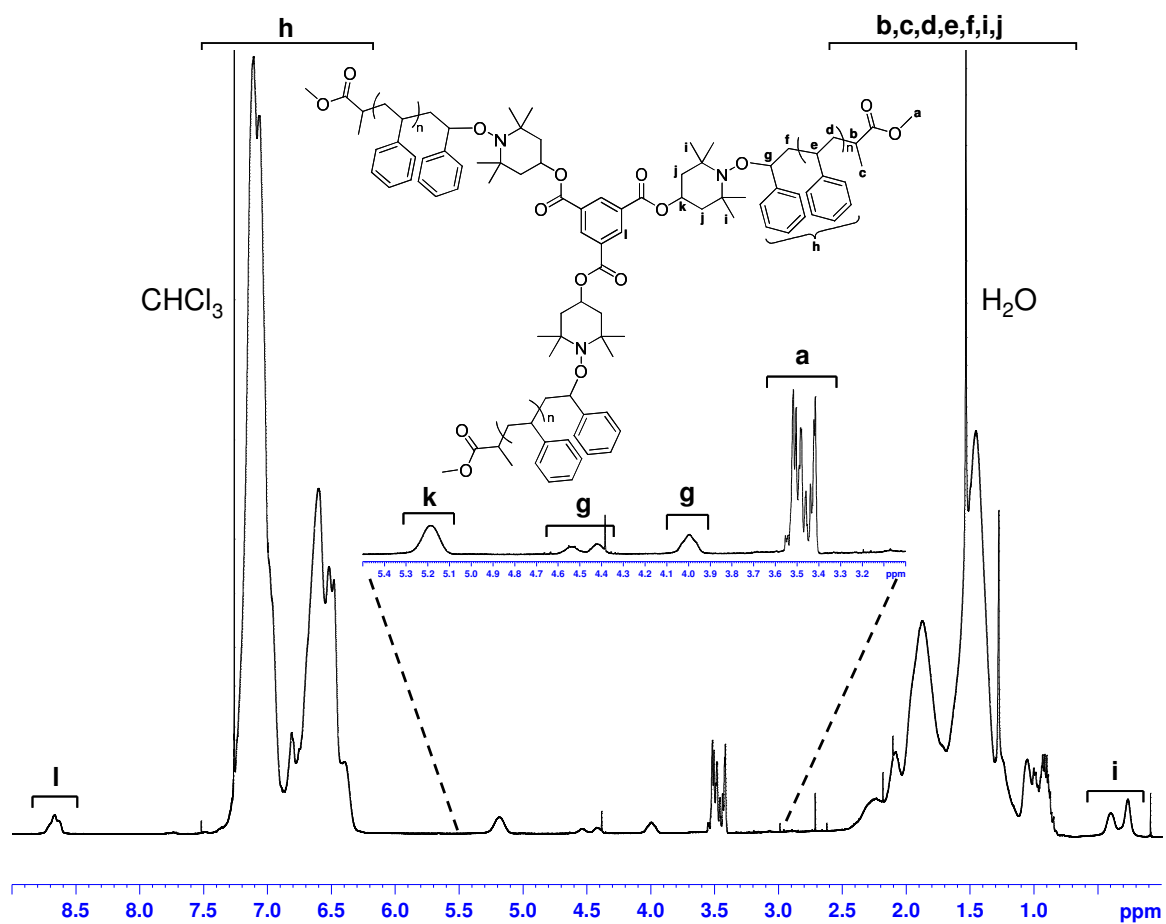

**Figure S8.**  $^1\text{H}$  NMR spectra of 3-arm star with expanded view of region between 3-5.5 ppm. The sample was obtained on a Bruker DRX 400 MHz spectrometer and the solvent used was  $\text{CDCl}_3$ .

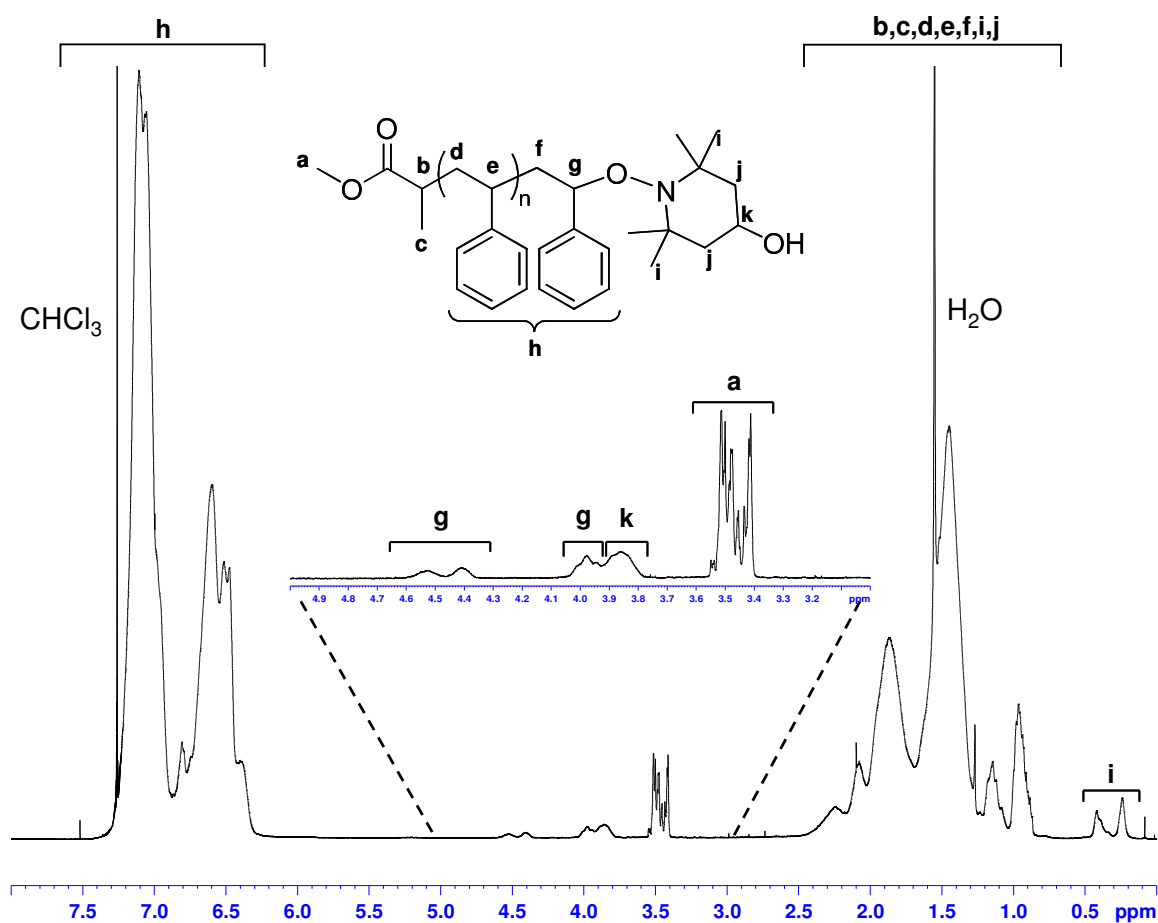

**Figure S9.**  $^1\text{H}$  NMR spectra of PSTY-TEMPO-OH formed from NRC of PSTY-Br and Tempo-OH, with expanded view of region between 3 and 5 ppm. The sample was obtained on a Bruker DRX 400 MHz spectrometer and the solvent used was  $\text{CDCl}_3$ .

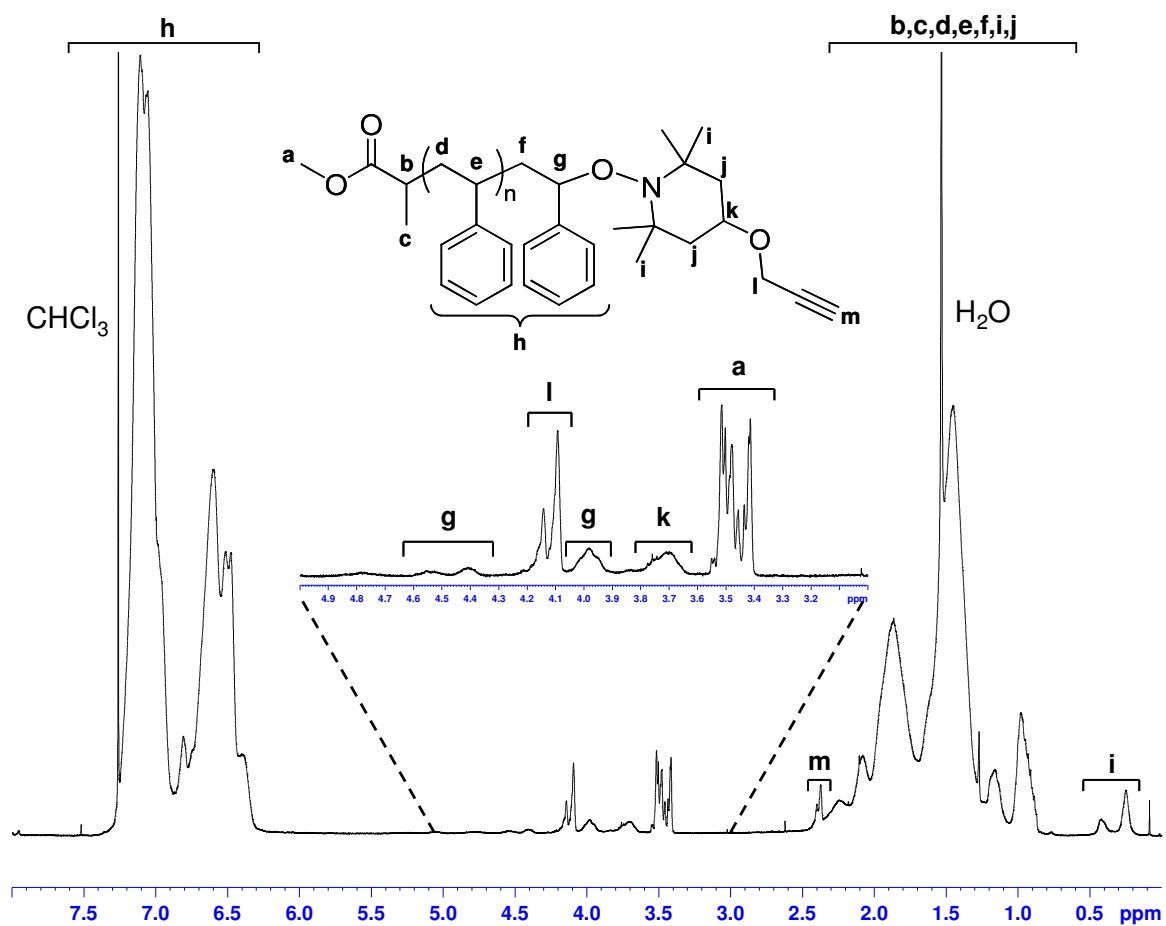

**Figure S10.**  $^1\text{H}$  NMR spectra of PSTY-TEMPO- $\equiv$  formed from PSTY-TEMPO-OH exchange with TEMPO- $\equiv$ , with expanded view of region between 3 and 5 ppm. The sample was obtained on a Bruker DRX 400 MHz spectrometer and the solvent used was  $\text{CDCl}_3$ .

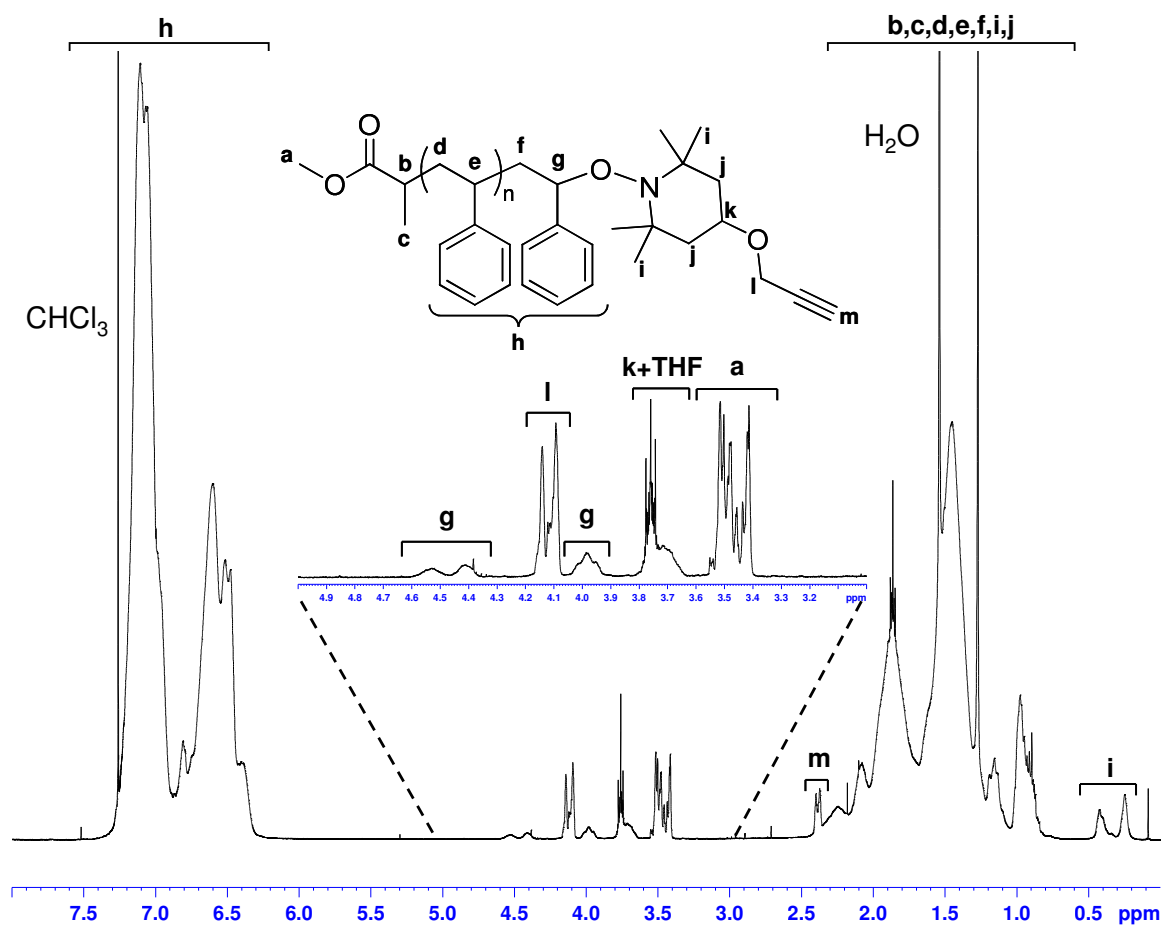

**Figure S11.**  $^1\text{H}$  NMR spectra of PSTY-TEMPO- $\equiv$  formed from NRC of PSTY-Br and TEMPO- $\equiv$ , with expanded view of region between 3 and 5 ppm. The sample was obtained on a Bruker DRX 400 MHz spectrometer and the solvent used was  $\text{CDCl}_3$ .

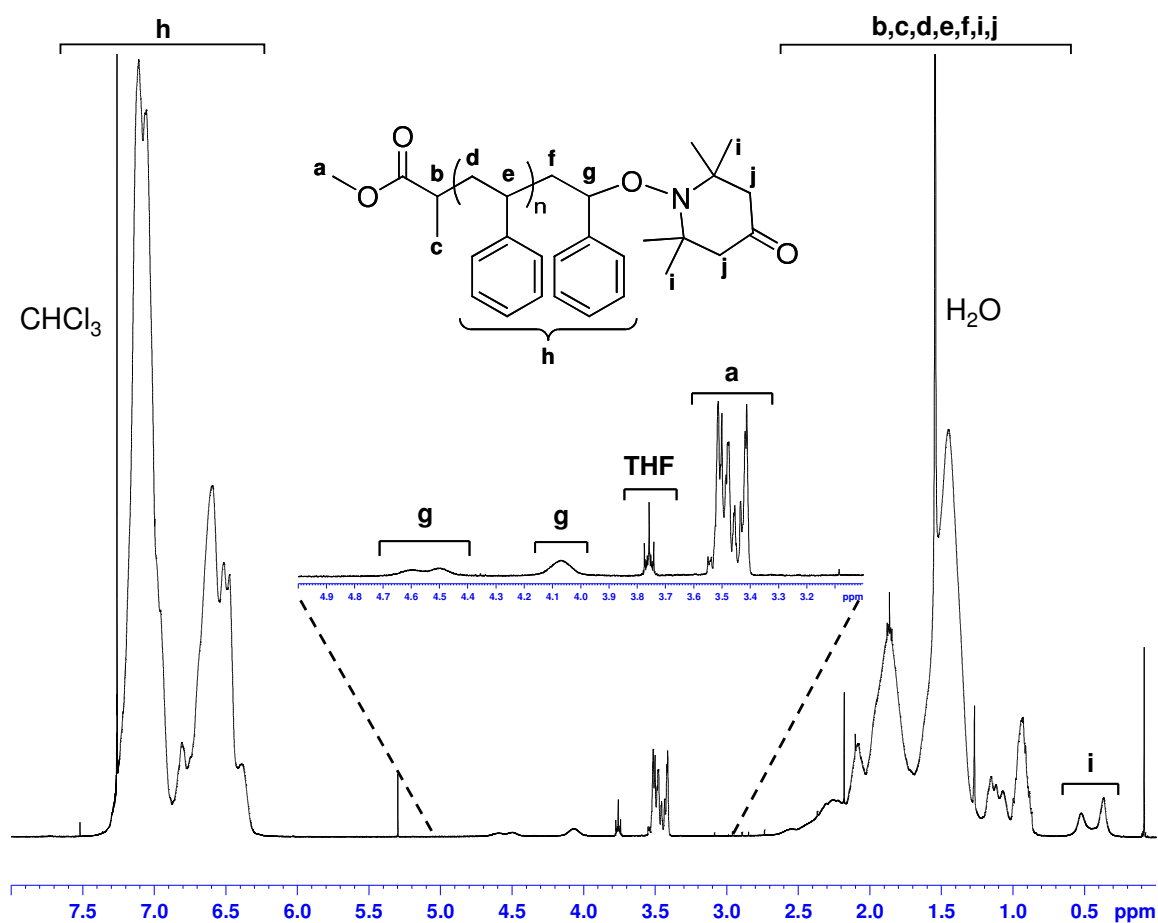

**Figure S12.**  $^1\text{H}$  NMR spectra of PSTY-TEMPO=O formed from NRC of PSTY-Br and TEMPO=O, with expanded view of region between 3 and 5 ppm. The sample was obtained on a Bruker DRX 400 MHz spectrometer and the solvent used was  $\text{CDCl}_3$ .



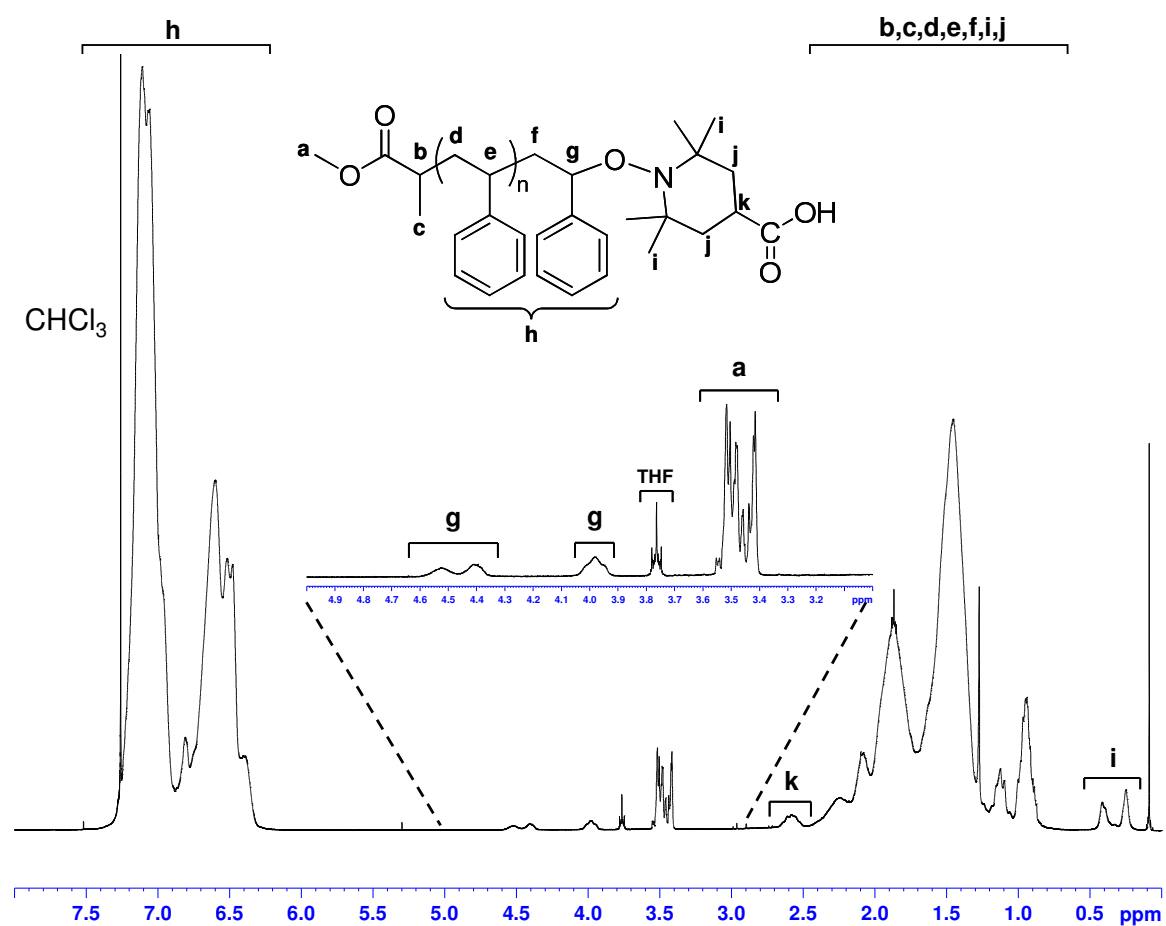

**Figure S13.**  $^1\text{H}$  NMR spectra of PSTY-TEMPO-COOH formed from NRC of PSTY-Br and TEMPO-COOH, with expanded view of region between 3 and 5 ppm. The sample was obtained on a Bruker DRX 400 MHz spectrometer and the solvent used was  $\text{CDCl}_3$ .

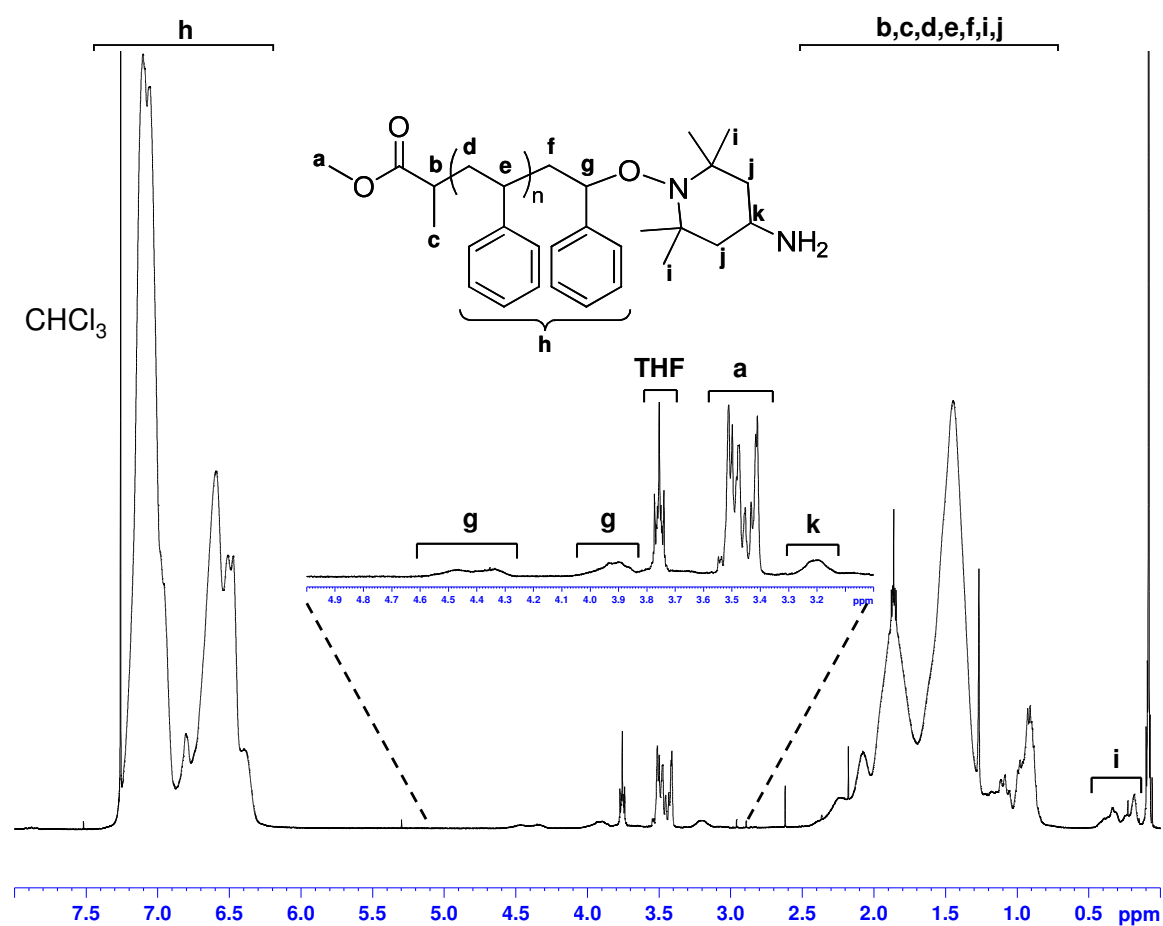

**Figure S14.**  $^1\text{H}$  NMR spectra of PSTY-TEMPO- $\text{NH}_2$  formed from NRC of PSTY-Br and TEMPO- $\text{NH}_2$ , with expanded view of region between 3 and 5 ppm. The sample was obtained on a Bruker DRX 400 MHz spectrometer and the solvent used was  $\text{CDCl}_3$ .

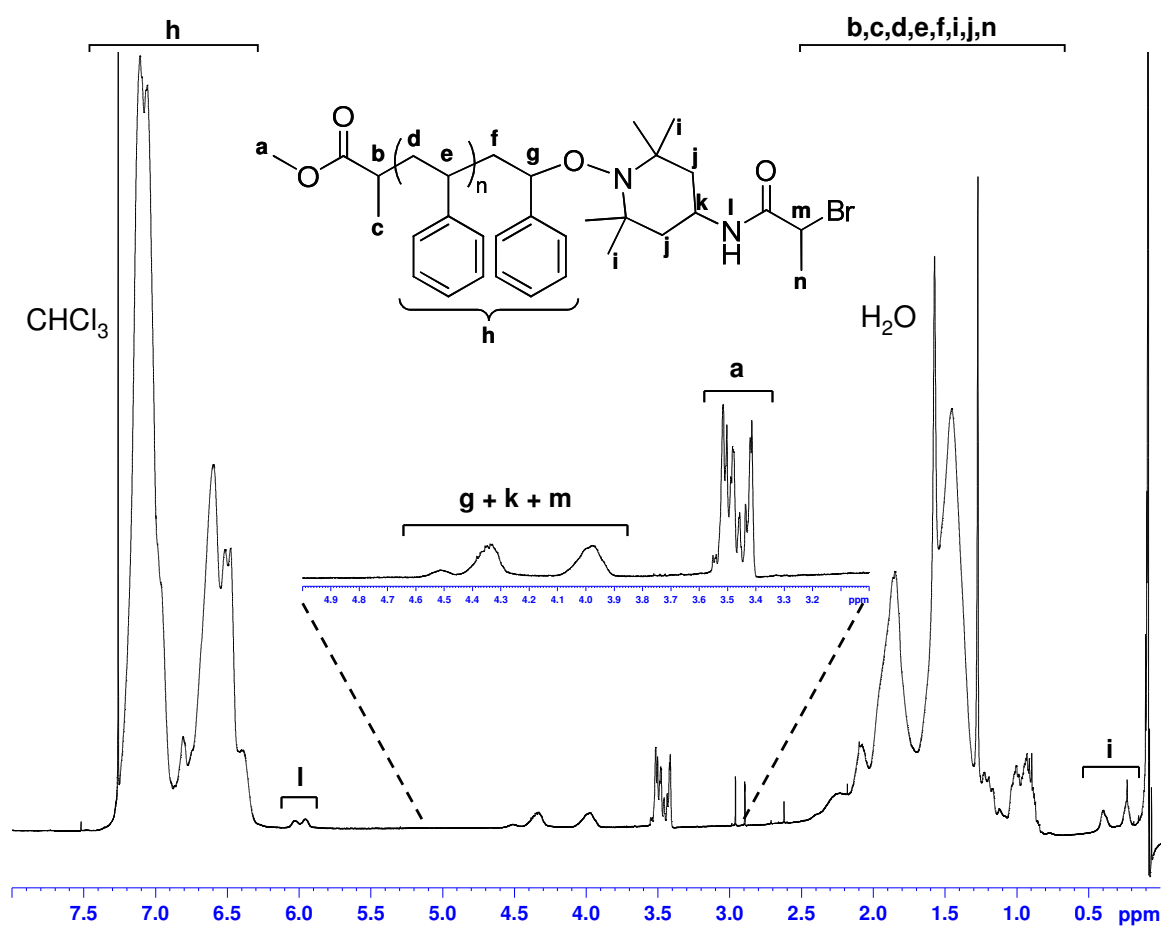

**Figure S15.**  $^1\text{H}$  NMR spectra of PSTY-TEMPO-2-bromopropanamide formed from esterification of PSTY-TEMPO- $\text{NH}_2$  with 2-bromopropionyl bromide, with expanded view of region between 3 and 5 ppm. The sample was obtained on a Bruker DRX 400 MHz spectrometer and the solvent used was  $\text{CDCl}_3$ .

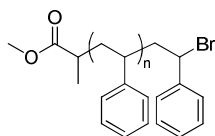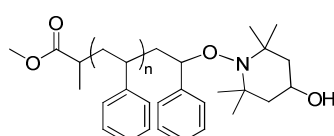

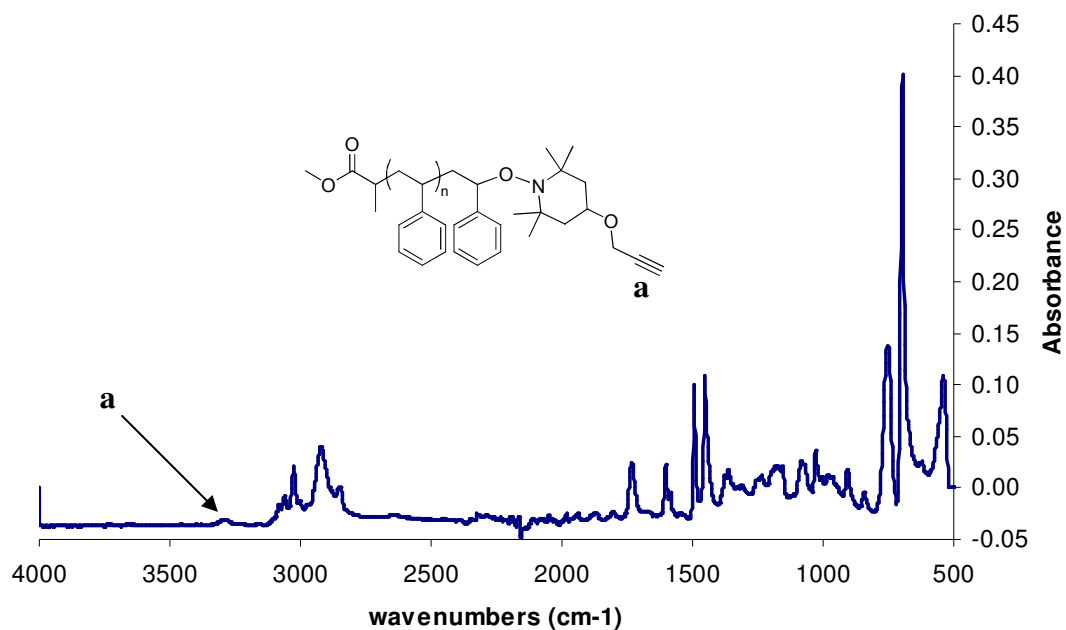

**Figure S18.** ATR-FTIR spectrum of PSTY-TEMPO-≡ formed from 3-arm decoupling and exchange with TEMPO-≡.

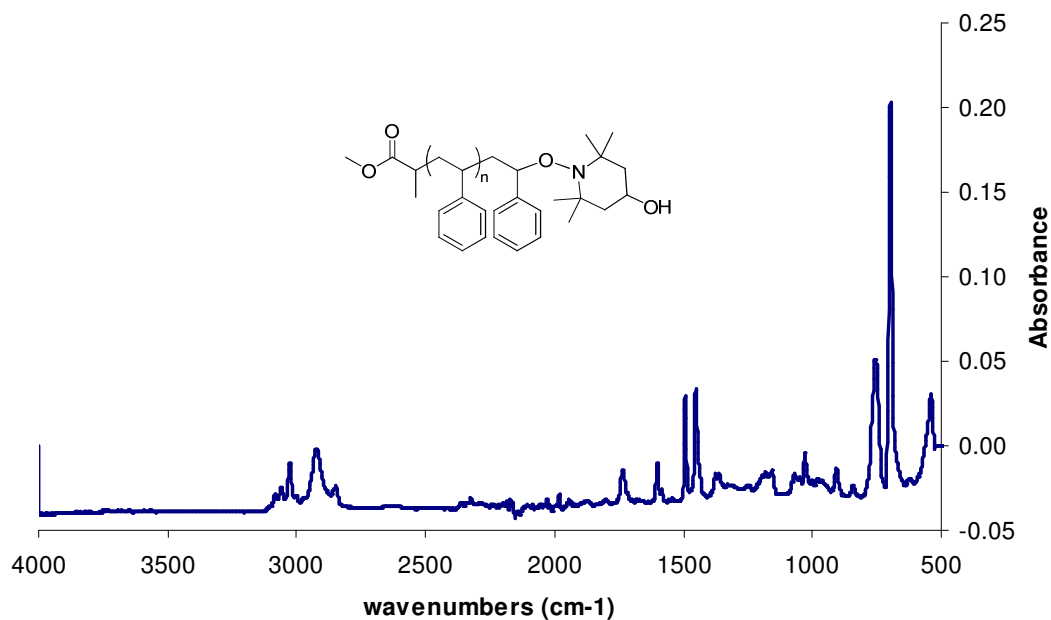

**Figure S19.** ATR-FTIR spectrum of PSTY-TEMPO-OH formed from NRC of PSTY-Br and TEMPO-OH.

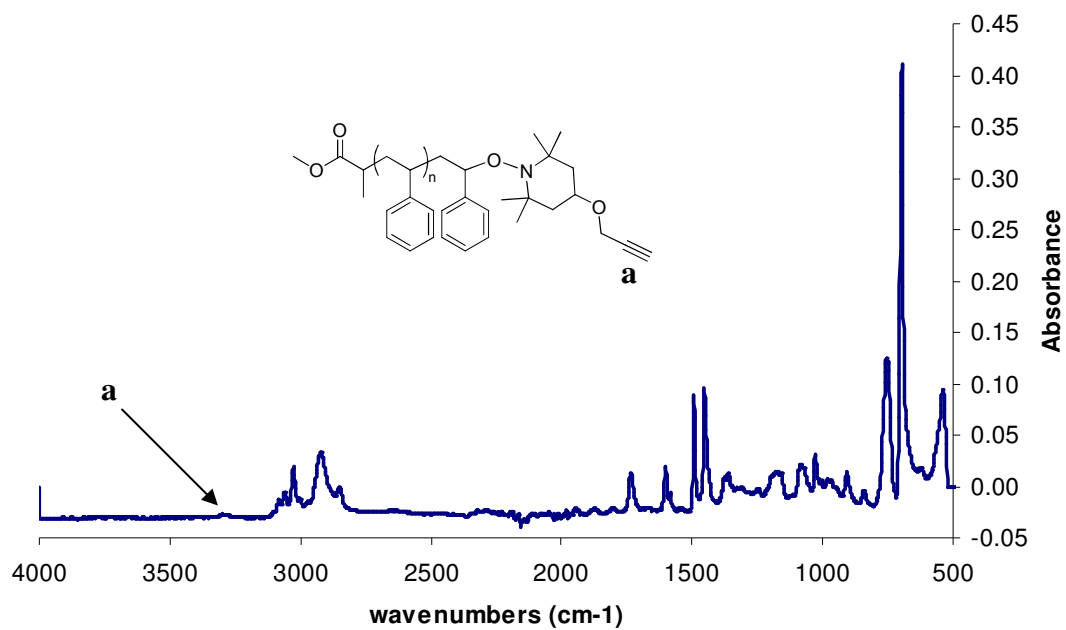

**Figure S20.** ATR-FTIR spectrum of PSTY-TEMPO-≡ formed from PSTY-TEMPO-OH exchange with TEMPO-≡.

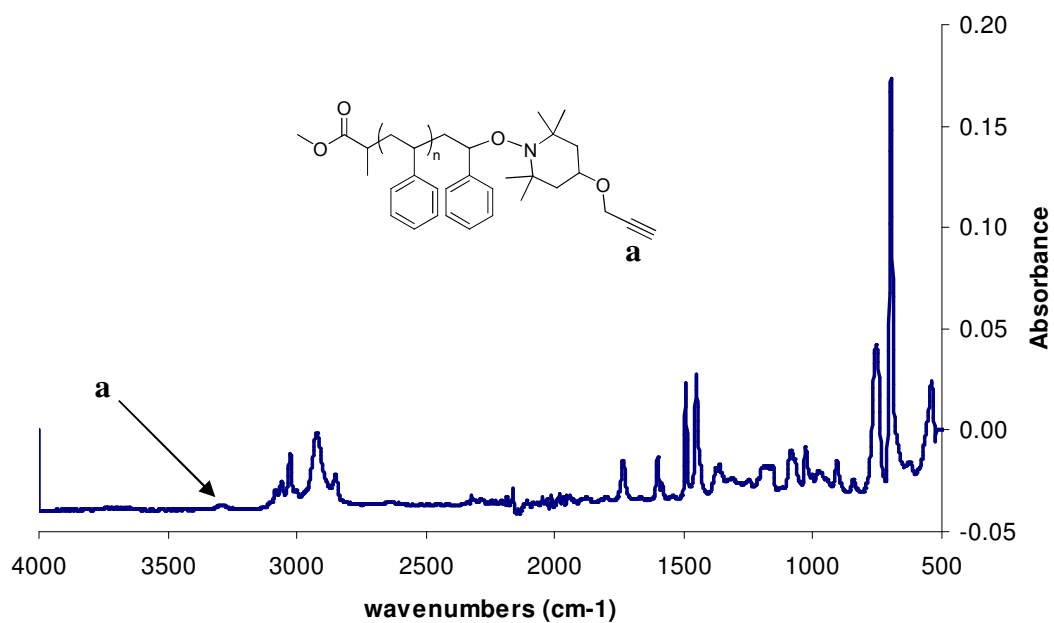

**Figure S21.** ATR-FTIR spectrum of PSTY-TEMPO-≡ formed from NRC of PSTY-Br and TEMPO-≡.

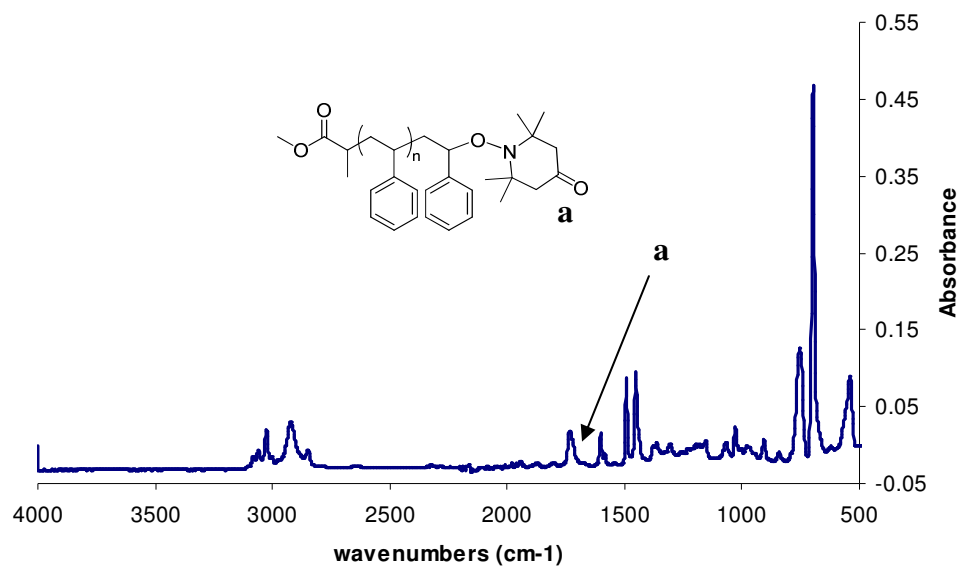

**Figure S22.** ATR-FTIR spectrum of PSTY-TEMPO=O formed from NRC of PSTY-Br and TEMPO=O. (a) corresponds to the C=O stretch from the initiator used (methyl-2-bromopropionate), which is definitively broadened by the presence of the TEMPO=O carbonyl stretch.

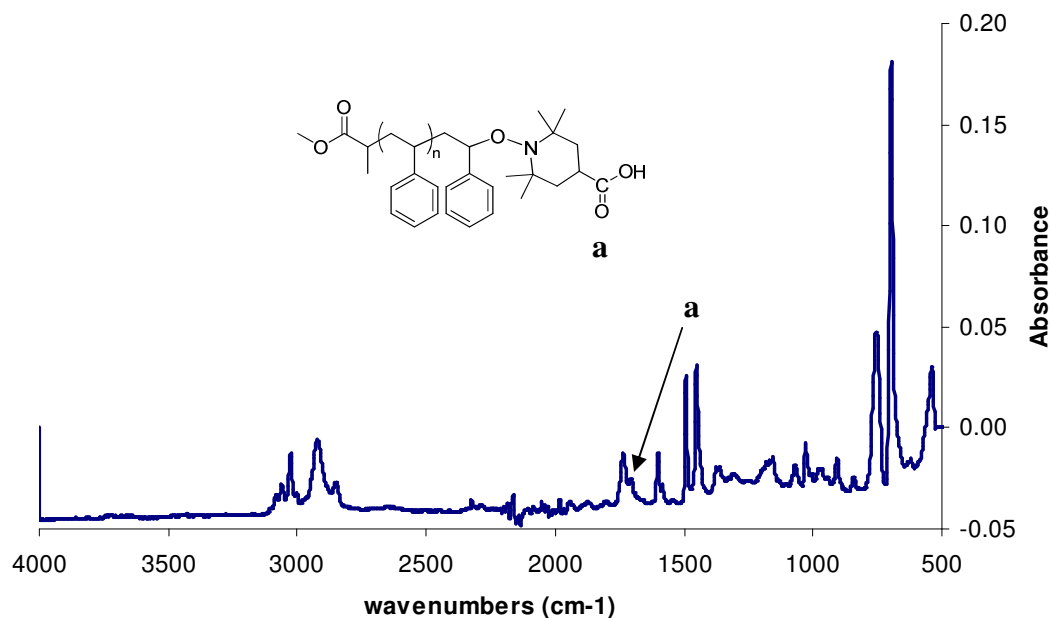

**Figure S23.** ATR-FTIR spectrum of PSTY-TEMPO-COOH formed from NRC of PSTY-Br and TEMPO-COOH.

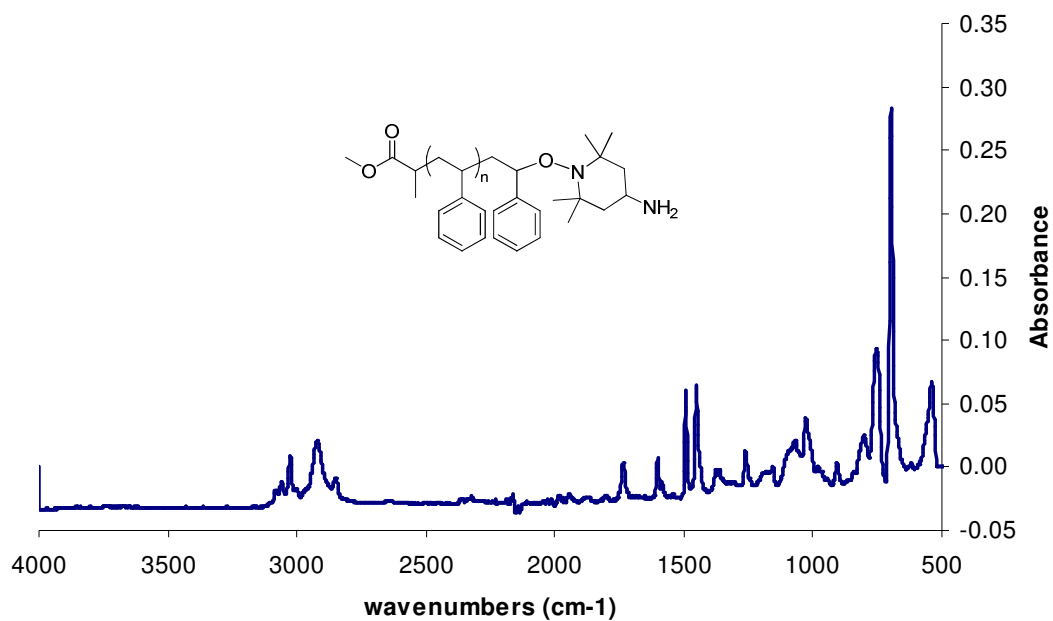

**Figure S24.** ATR-FTIR spectrum of PSTY-TEMPO-NH<sub>2</sub> formed from NRC of PSTY-Br and TEMPO-NH<sub>2</sub>.

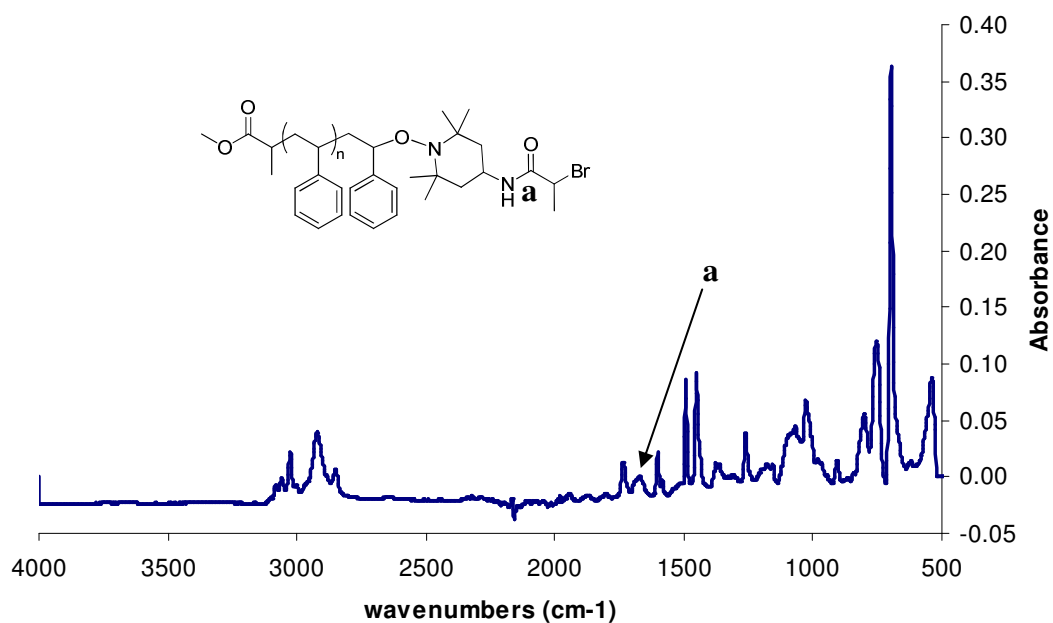

**Figure S25.** ATR-FTIR spectrum of PSTY-TEMPO-2-bromopropanamide formed from acylation of PSTY-TEMPO-NH<sub>2</sub> with 2-bromopropionyl bromide.
